# Supplementary material
Source: Springer Nature journal article supplement (https://www.springermedizin.de/resource/supplementary/12916_2012_759_MOESM3_ESM.pdf/9598238)
Supplement: MOESM3 [file 9598238]

**Additional file 2:** Re-assessment of protein serum markers IFN $\gamma$ , IL6, TNF $\alpha$ , IGFBP and Rantes by CBA and ELISA (arbitrary serum concentration units). Between 11 and 15 randomly selected sera from the different NF1 groups (For IFN $\gamma$ , IL6, TNF $\alpha$ : all NF1 vs. control; for IGFBP and Rantes: NF1 with no PNF or MPNST, NF1 with only PNF and NF1 with MPNST) and 5 control sera were tested as indicated (n.d. not determined). Where available, associated protein array data are shown. Statistical analysis is shown for Array and CBA/ELISA data (T-Test).

| No             | ID                  | Age | Gender | IFN $\gamma$ |         | IL6     |        | TNF $\alpha$ |        | IGFBP1           |         | Rantes  |          |         |         |          |          |        |
|----------------|---------------------|-----|--------|--------------|---------|---------|--------|--------------|--------|------------------|---------|---------|----------|---------|---------|----------|----------|--------|
|                |                     |     |        | Array        | CBA     | Array   | CBA    | Array        | CBA    | Array            | ELISA   | Array   | CBA      |         |         |          |          |        |
| 1              | Control             | 53  | f      | 102          | 43,2    | 455     | 3416,1 | 748,2        | 8,2    | 16533,3          | 190,6   | 36901,5 | 17761,8  |         |         |          |          |        |
| 2              | Control             | 31  | m      | 166          | 46,5    | 355     | 3322,8 | 572          | 7,4    | 9376             | 80,6    | 33597   | 22715    |         |         |          |          |        |
| 3              | Control             | 25  | m      | 102          | 48,9    | 227,2   | 3356,3 | 363,3        | 8,5    | 4401             | 87,5    | 31793,4 | 32177,4  |         |         |          |          |        |
| 4              | Control             | 38  | f      | n.d.         | 34,8    | n.d.    | 3495,6 | n.d.         | 7,8    | n.d.             | 234,4   | n.d.    | 21001,8  |         |         |          |          |        |
| 5              | Control             | 58  | m      | n.d.         | 38,8    | n.d.    | 3559,4 | n.d.         | 6,7    | n.d.             | 160,5   | n.d.    | 16461,2  |         |         |          |          |        |
| 6              | Control             | 28  | m      | n.d.         | n.d.    | n.d.    | 404,1  | n.d.         | n.d.   | n.d.             | n.d.    | n.d.    | n.d.     |         |         |          |          |        |
| 7              | Control             | 64  | f      | 47,7         | n.d.    | 225,1   | 401,4  | 289,3        | n.d.   | 1377,6           | n.d.    | 36452,3 | n.d.     |         |         |          |          |        |
| Average        |                     | 42  |        | 104,43       | 42,44   | 315,58  | 2565,1 | 493,2        | 7,72   | 7921,98          | 150,72  | 34686,1 | 22023,44 |         |         |          |          |        |
| 1              | NF1                 | 20  | f      | 216,1        | 41,3    | 529,3   | 3373,6 | 921,9        | n.d.   | 14546,8          | 220,2   | 28500,6 | 25158,4  |         |         |          |          |        |
| 2              | NF1                 | 26  | m      | 218,5        | 52,8    | 472     | 3744,8 | 859,9        | 8,3    | 17672,3          | 210,1   | 36566,7 | 43956,3  |         |         |          |          |        |
| 3              | NF1                 | 14  | m      | 191,7        | 55,2    | 551,8   | 3451,1 | 972,6        | n.d.   | 17968,1          | 166,7   | 35254,1 | 45736,9  |         |         |          |          |        |
| 4              | NF1                 | 41  | f      | 215,2        | 58,5    | 779,7   | 3719,4 | 1180,4       | 8,7    | 10462            | 193,8   | 33562,2 | 26864,4  |         |         |          |          |        |
| 5              | NF1                 | 46  | m      | 139,4        | 52,8    | 285,2   | 3802,8 | 439,3        | n.d.   | 19422            | 428,3   | 32496,2 | 21692,5  |         |         |          |          |        |
| 6              | NF1                 | 31  | m      | 313          | 57,6    | 568     | 4039,2 | 972          | 9,6    | 25915            | 199,4   | 53085   | 18748,8  |         |         |          |          |        |
| 7              | PNF                 | 51  | m      | 289,3        | n.d.    | 628,8   | 3931,2 | 823,8        | 8,7    | 12079,9          | 133,4   | 29294,3 | 44394,1  |         |         |          |          |        |
| 8              | PNF                 | 40  | m      | 134          | 48,1    | 437     | 3844,2 | 524          | 8      | 21106            | 371,1   | 29225   | 17445,7  |         |         |          |          |        |
| 9              | PNF                 | 44  | f      | n.d.         | n.d.    | n.d.    | 2719,4 | n.d.         | n.d.   | n.d.             | n.d.    | n.d.    | n.d.     |         |         |          |          |        |
| 10             | PNF                 | 36  | m      | 137,3        | 54,4    | 398,4   | 3390,3 | 597,1        | 8,5    | 13030,1          | 221,4   | 40942   | 14736,7  |         |         |          |          |        |
| 11             | PNF*high tumor load | 18  | m      | 207          | 52      | 546,2   | 3568,6 | 870,8        | 8,4    | 23680,2          | 1305,9  | 28649,3 | 26613,1  |         |         |          |          |        |
| 12             | MPNST               | 26  | m      | 896          | 54,4    | 1070    | 2719,4 | 2855         | 8,3    | 32491            | 430,2   | 49833   | 75390,3  |         |         |          |          |        |
| 13             | MPNST               | 38  | m      | 212          | 55,2    | 325     | n.d.   | 950          | n.d.   | 24079            | 772,2   | 37519   | 47836,2  |         |         |          |          |        |
| 14             | MPNST               | 40  | f      | 216          | n.d.    | 488,4   | n.d.   | 784          | 8,7    | 21849,9          | 342,8   | 27270,7 | 45284,4  |         |         |          |          |        |
| 15             | MPNST               | 39  | f      | 247          | n.d.    | 637     | n.d.   | 1019         | 8,6    | 22567            | 191,3   | 31883   | 63863,2  |         |         |          |          |        |
| 16             | MPNST               | 43  | f      | 284,4        | n.d.    | 569,5   | n.d.   | 1072,4       | 8,3    | 29761,5          | 1086,5  | 46496,6 | 52461,3  |         |         |          |          |        |
| Average        |                     | 35  |        | 261,13       | 52,936  | 552,42  | 3525,3 | 989,48       | 8,5545 | 17664,4          | p<0.031 | 236,417 | p<0.13   | 36577,5 | p<0.69  | 30359,55 | p<0.19   |        |
| NF1 vs control |                     |     |        | p<0.116      | p<0.002 | p<0.031 | p<0.05 | p<0.103      | p<0.01 | 17474,1          | p<0.073 | 507,95  | p<0.181  | 32027,7 | p<0.44  | 25797,4  | p<0.59   |        |
|                |                     |     |        |              |         |         |        |              |        | MPNST vs control | 26149,7 | p<0.002 | 564,6    | p<0.036 | 38600,5 | p<0.46   | 56967,08 | p<0.01 |
